# Supplementary material
Source: PubMed Central journal article supplement (PMC7863258)

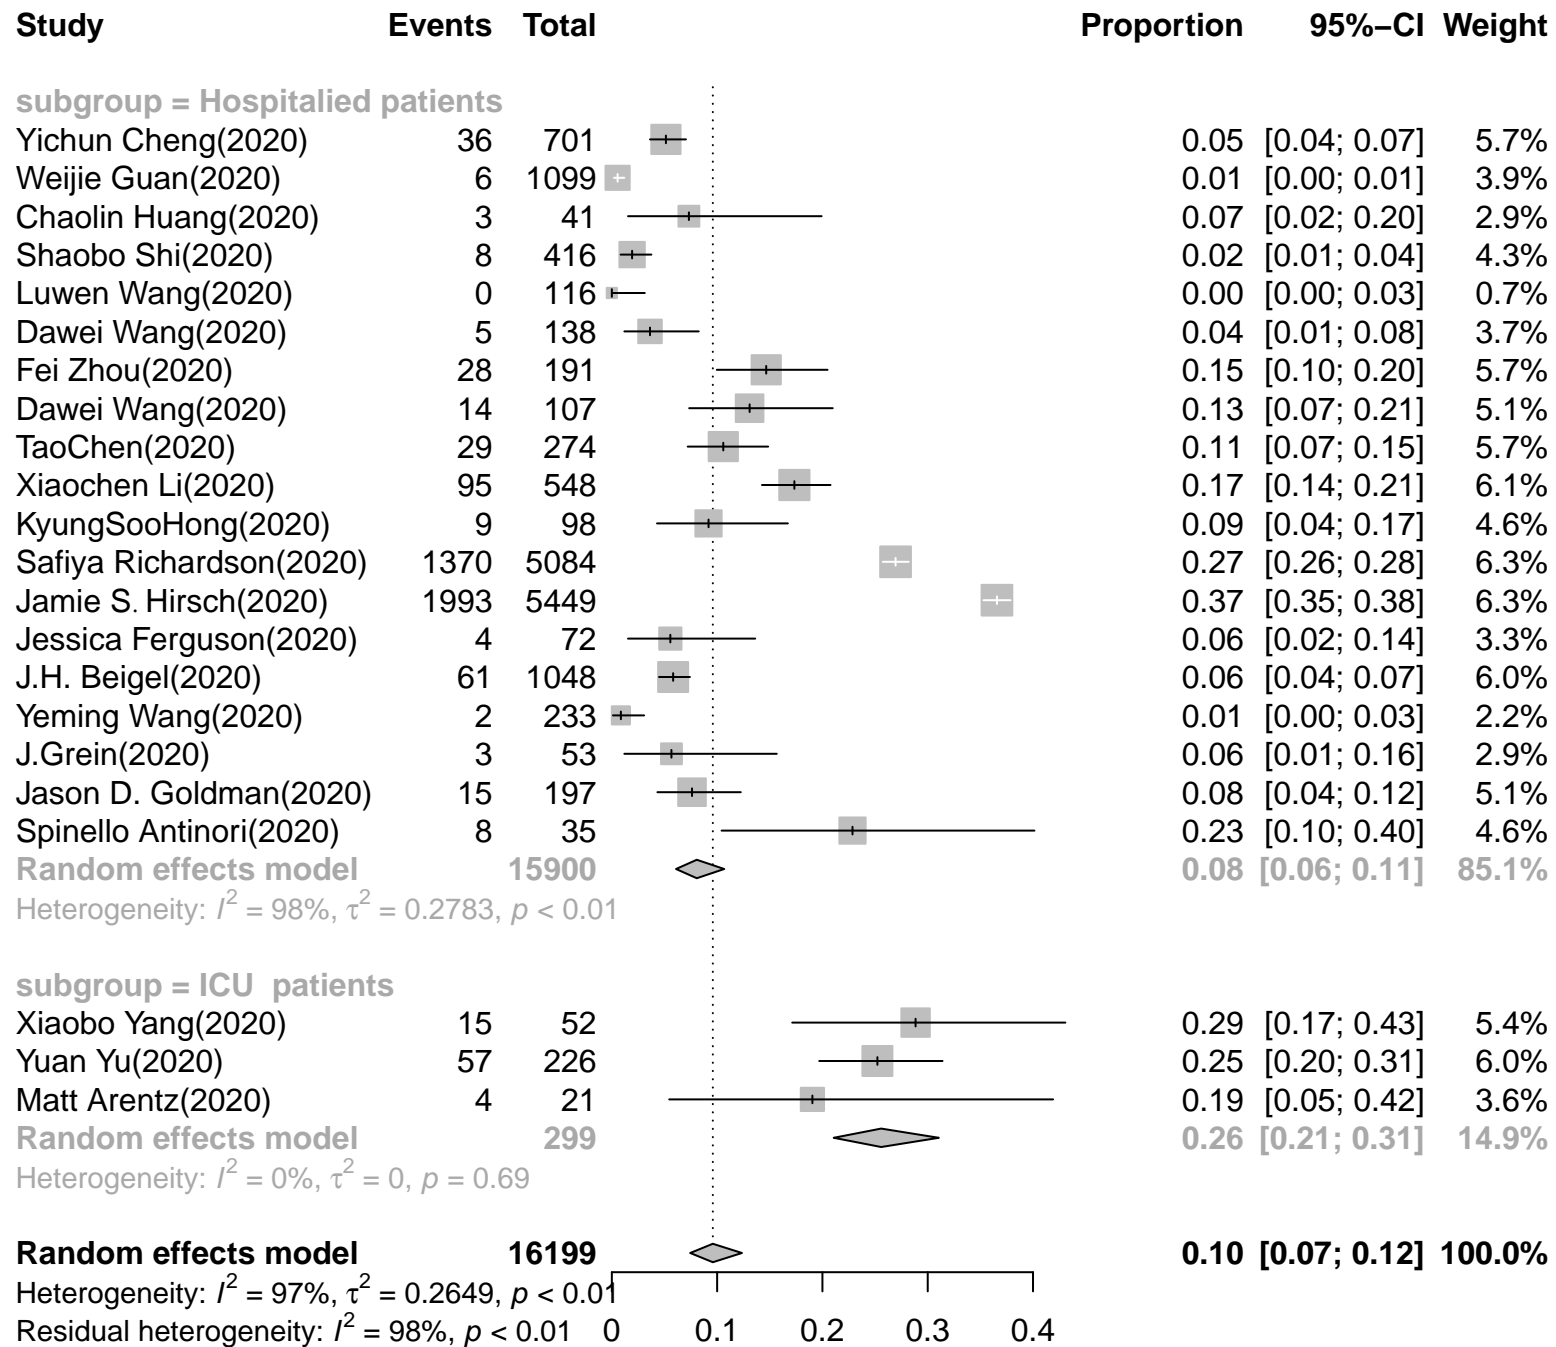

Supplement: 12882_2021_2244_MOESM3_ESM.pdf [file 12882_2021_2244_MOESM3_ESM.pdf]
